# Supplementary material for: Preservation of Helicobacter pylori CagA Translocation and Host Cell Proinflammatory Responses in the Face of CagL Hypervariability at Amino Acid Residues 58/59
Source: PubMed Central journal article supplement (PMC4509909; doi:10.1371/journal.pone.0133531), 2015-07-21
Supplement: pone.0133531.s001.pdf [file pone.0133531.s001.pdf]

A

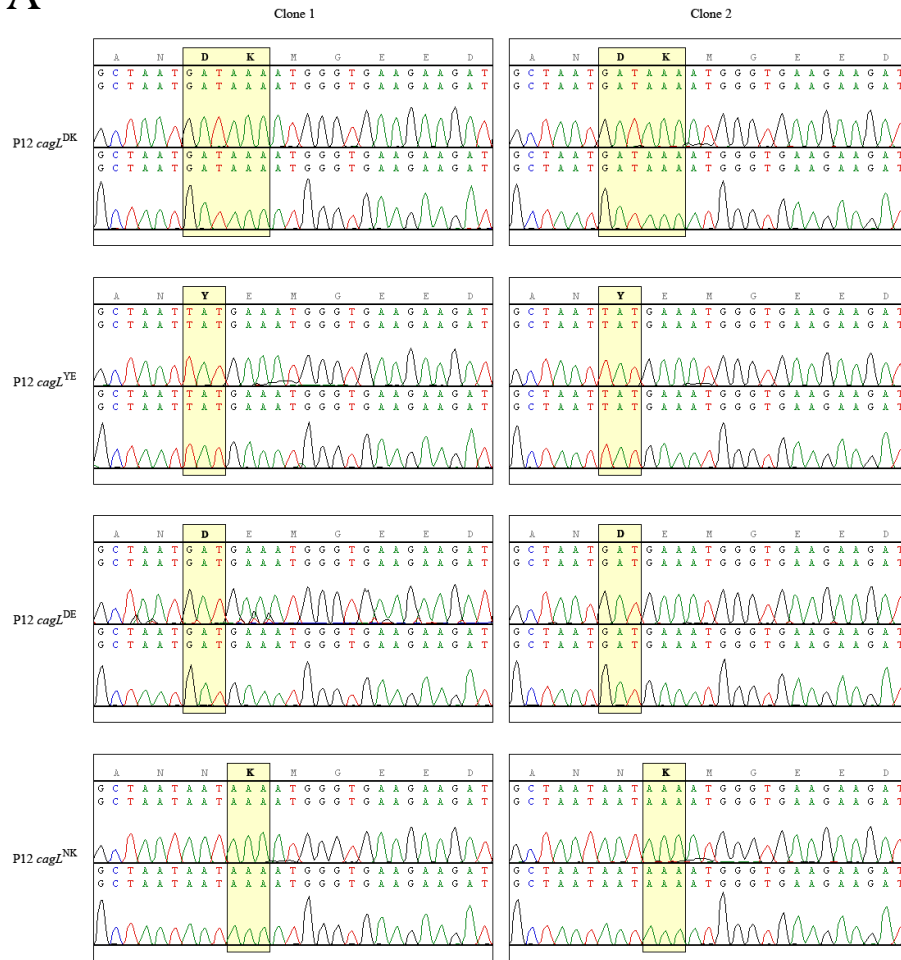

B

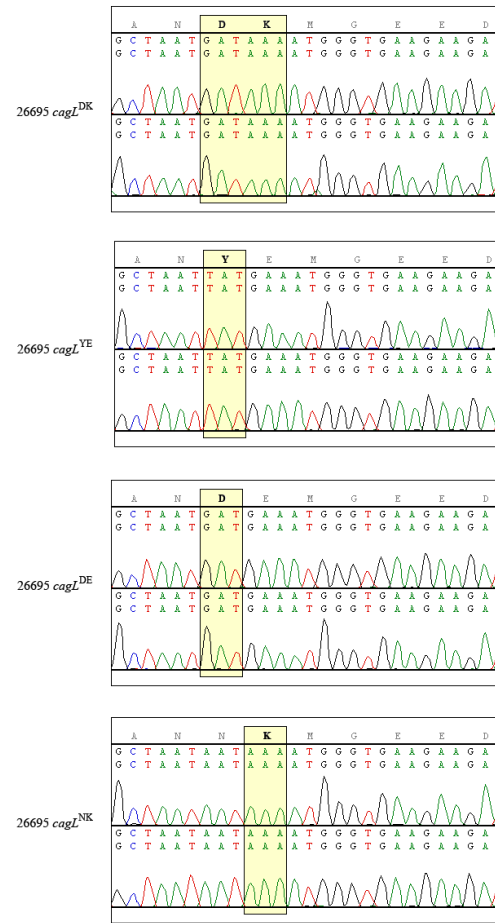

### S1 Figure. Sequence analysis of *cagL* variant mutants generated in this study.

Sequencing chromatograms of (A) two independent clones (Clone 1 and Clone 2) of P12*cagL*<sup>DK</sup>, P12*cagL*<sup>YE</sup>, P12*cagL*<sup>DE</sup> and P12*cagL*<sup>NK</sup>; (B) single clones of 26695*cagL*<sup>DK</sup>, 26695*cagL*<sup>YE</sup>, 26695*cagL*<sup>DE</sup> and 26695*cagL*<sup>NK</sup>.
