# Supplementary material for: Preservation of Helicobacter pylori CagA Translocation and Host Cell Proinflammatory Responses in the Face of CagL Hypervariability at Amino Acid Residues 58/59
Source: PubMed Central journal article supplement (PMC4509909; doi:10.1371/journal.pone.0133531), 2015-07-21
Supplement: pone.0133531.s002.pdf [file pone.0133531.s002.pdf]

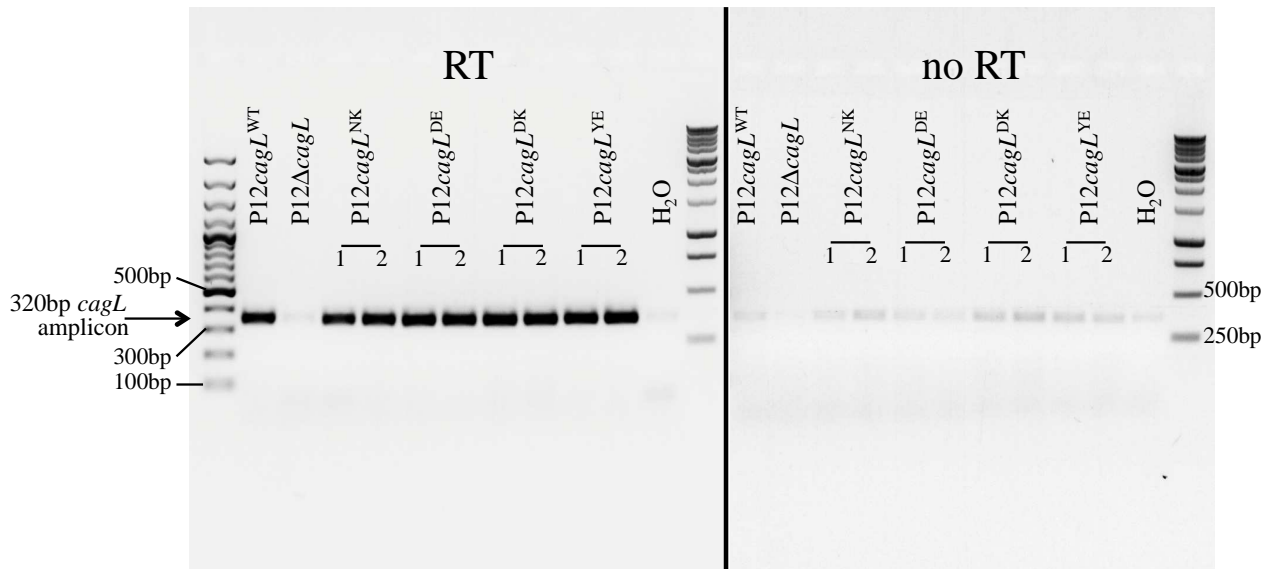

**S2 Figure. Reverse transcription PCR analysis of *cagL* transcription during co-culture with AGS cells.**

RNA purified from *H. pylori*-inoculated AGS cells at 3 hpi was used as a template for *cagL* PCR either following reverse transcription for cDNA production (RT) or without cDNA production (no RT). The *cagL*-specific amplicon was 320 bp; *cagL* expression was not observed in P12Δ*cagL* mutant but was successfully restored in all P12 CagL substitution mutants.
