# Supplementary material for: Preservation of Helicobacter pylori CagA Translocation and Host Cell Proinflammatory Responses in the Face of CagL Hypervariability at Amino Acid Residues 58/59
Source: PubMed Central journal article supplement (PMC4509909; doi:10.1371/journal.pone.0133531), 2015-07-21
Supplement: pone.0133531.s003.pdf [file pone.0133531.s003.pdf]

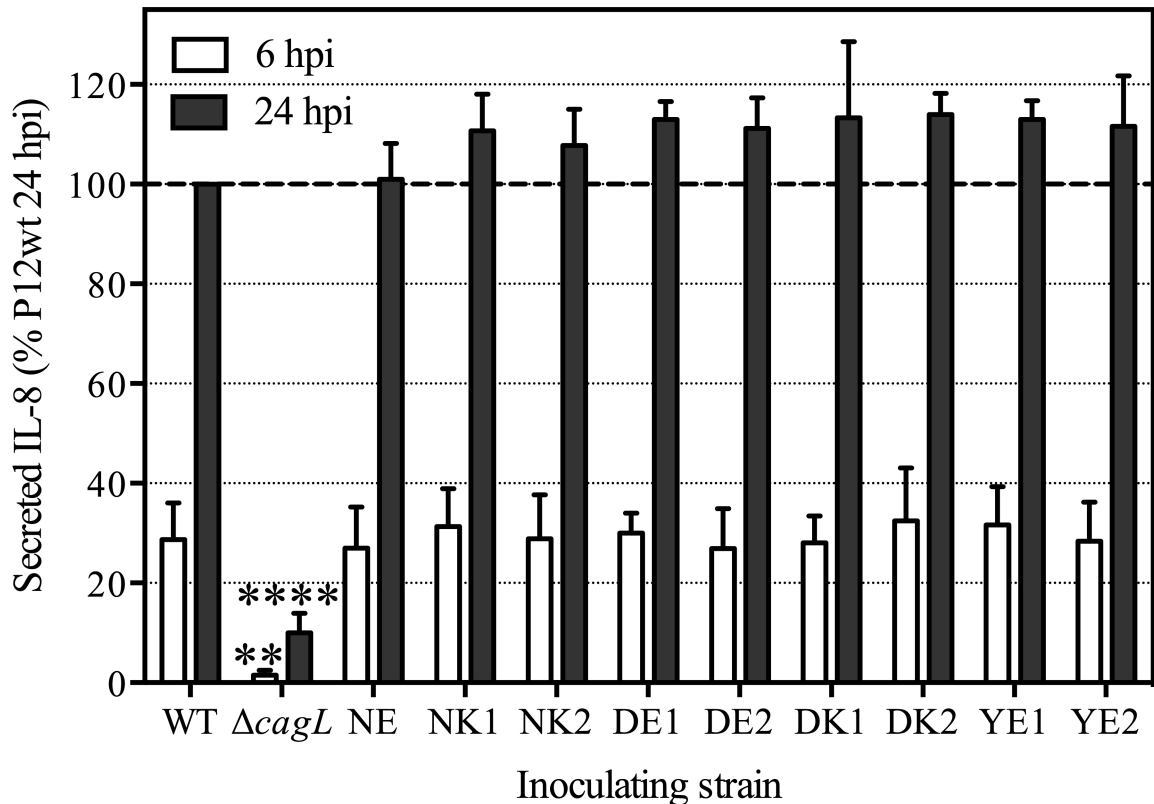

**S3 Figure. AGS cell IL-8 secretion induced by independent replicate clones of *H. pylori* isogenic CagL<sup>58/59</sup> substitution mutants.**

Spent culture medium was collected at 6 or 24 hours post-inoculation with P12 wild-type (WT; D58K59), P12 $\Delta cagL$ , P12 $\Delta cagL$  knocked-in with 26695wt-derived *cagL* (NE) or two independent replicate clones (denoted by Arabic numerals) of P12 $\Delta cagL$  knocked-in with 26695-derived *cagL* carrying substitutions at amino acids 58 and/or 59 (NK, DE, DK or YE). Samples were assayed for IL-8 levels by ELISA and data from individual experiments were standardized as a percentage of IL-8 secretion by isogenic WT strain at 24 hours post-inoculation to correct for interassay variability in absolute IL-8 levels, and allow pooling of data from multiple independent experiments for statistical analysis; bars denote mean  $\pm$  SD from  $\geq 3$  independent experiments (each performed in duplicate). \*\*  $P < 0.01$ , \*\*\*\*  $P < 0.0001$  against all other isogenic strains at same time-point by two-way ANOVA with Tukey's multiple comparisons test; all other comparisons not significantly different ( $P > 0.05$ ).
