# Supplementary material for: Preservation of Helicobacter pylori CagA Translocation and Host Cell Proinflammatory Responses in the Face of CagL Hypervariability at Amino Acid Residues 58/59
Source: PubMed Central journal article supplement (PMC4509909; doi:10.1371/journal.pone.0133531), 2015-07-21
Supplement: pone.0133531.s004.pdf [file pone.0133531.s004.pdf]

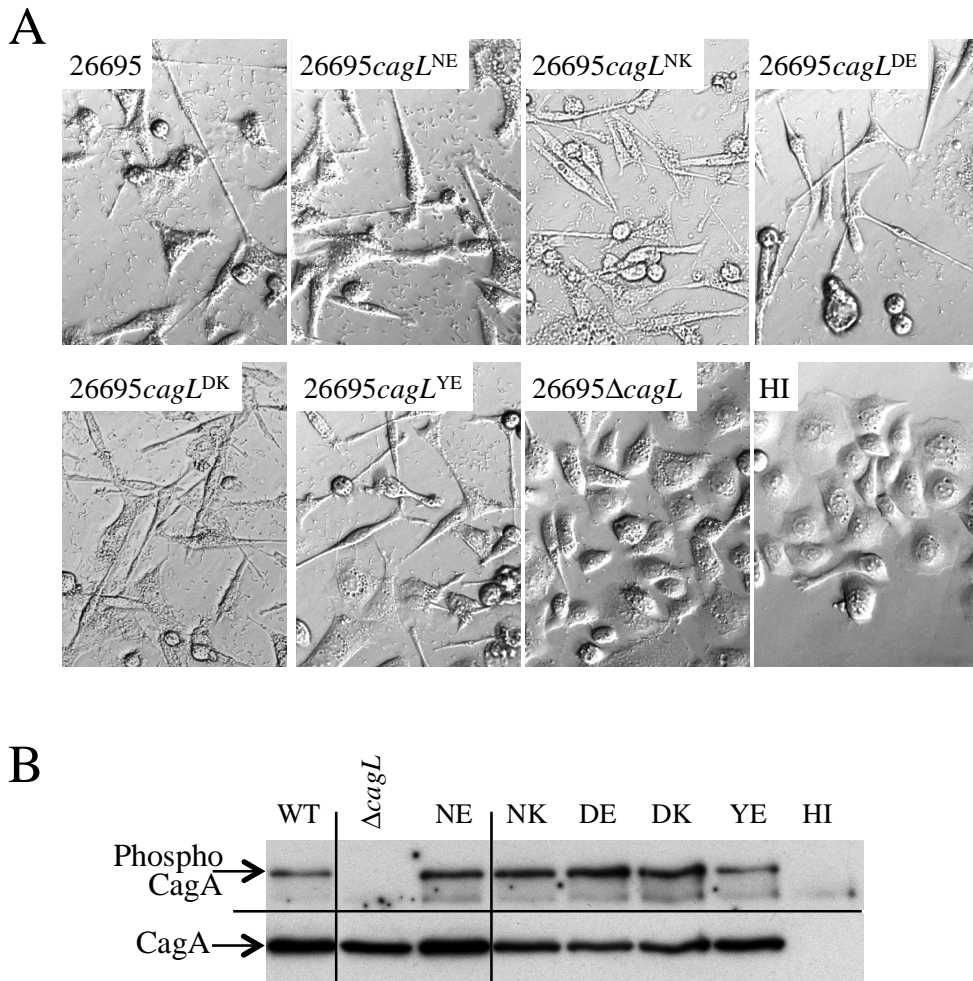

**S4 Figure. T4SS activity of 26695 CagL variant strains.**

(A) Hummingbird morphology of AGS cells in response to *H. pylori* 26695 CagL<sup>58/59</sup> substitution mutants at 8 hpi. (B) Immunoblot analysis of phosphorylated CagA in AGS cell lysates harvested at 24 hpi with *H. pylori* strains 26695 wt, 26695ΔcagL, 26695cagL<sup>wt(NE)</sup>, 26695cagL<sup>NK</sup>, 26695cagL<sup>DE</sup>, 26695cagL<sup>DK</sup>, 26695cagL<sup>YE</sup>, or sterile culture media (HI). Samples separated over a single SDS-PAGE gel, immunoblotted onto a single membrane and sequentially probed using anti-phosphotyrosine-specific monoclonal antibody PY99 followed by CagA-specific polyclonal antisera; lanes have been digitally reordered for visual ease (see S5 Figure for original blots).
