# Supplementary material for: Preservation of Helicobacter pylori CagA Translocation and Host Cell Proinflammatory Responses in the Face of CagL Hypervariability at Amino Acid Residues 58/59
Source: PubMed Central journal article supplement (PMC4509909; doi:10.1371/journal.pone.0133531), 2015-07-21
Supplement: pone.0133531.s005.pdf [file pone.0133531.s005.pdf]

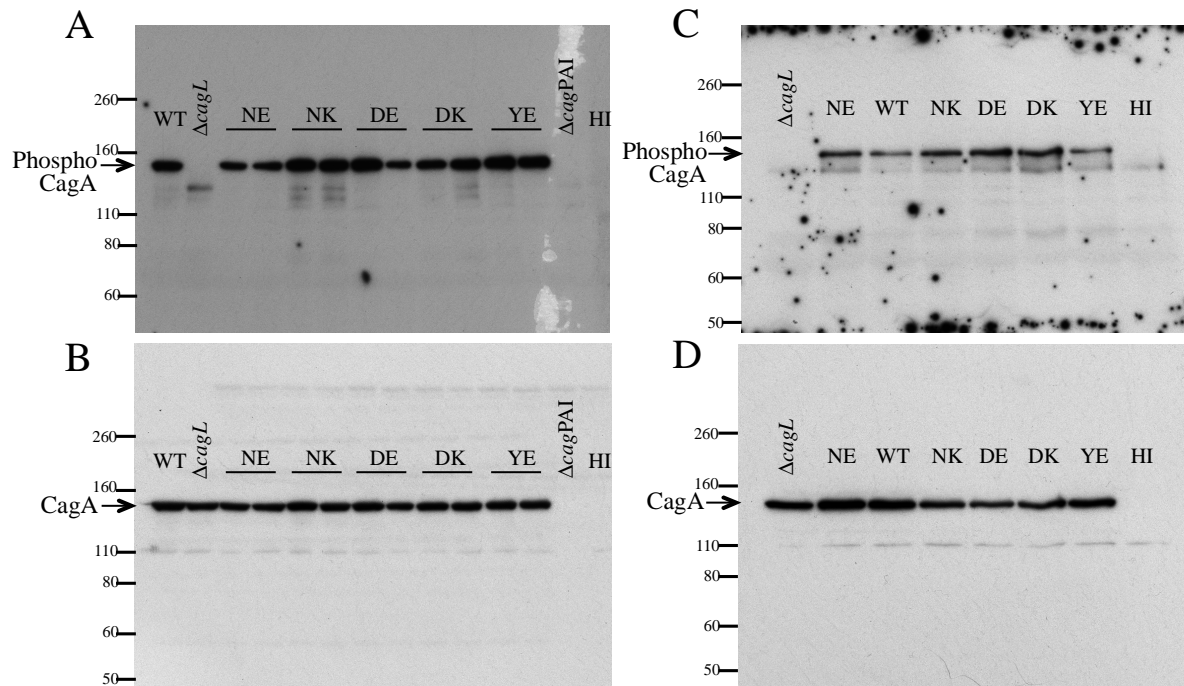

**S5 Figure. Original phosphotyrosine (A and C) and CagA immunoblots (B and D) shown in Fig. 2 (A and B) and S4 Figure (C and D).**

Refer to legends of Fig. 2 and S4 Figure for experimental details.
