# Supplementary material for: Preservation of Helicobacter pylori CagA Translocation and Host Cell Proinflammatory Responses in the Face of CagL Hypervariability at Amino Acid Residues 58/59
Source: PubMed Central journal article supplement (PMC4509909; doi:10.1371/journal.pone.0133531), 2015-07-21
Supplement: pone.0133531.s007.pdf [file pone.0133531.s007.pdf]

**S1 Table. *H. pylori* strains used in this study**

| <b>Bacterial Strain</b>         | <b>Genotype</b>                                                                                                                                                                            | <b>References</b> |
|---------------------------------|--------------------------------------------------------------------------------------------------------------------------------------------------------------------------------------------|-------------------|
| P12                             | Wild-type                                                                                                                                                                                  | [18]              |
| 26695                           | Wild-type                                                                                                                                                                                  | [19]              |
| P12 $\Delta$ <i>cagL</i>        | Complete <i>cagL</i> (HPP12_0546) deletion; Km <sup>R</sup>                                                                                                                                | [12]              |
| P12 <i>cagL</i> <sup>NE</sup>   | P12 $\Delta$ <i>cagL</i> knocked-in with <i>cagL</i> from p26695 <i>cagL</i> <sup>WT</sup> :: <i>cat</i> (HP0539); Cm <sup>R</sup> ; previously published as P12 <i>cagL</i> <sup>WT</sup> | [12]              |
| P12 <i>cagL</i> <sup>NK</sup>   | P12 $\Delta$ <i>cagL</i> knocked-in with <i>cagL</i> from p26695 <i>cagL</i> <sup>NK</sup> :: <i>cat</i> ; Cm <sup>R</sup>                                                                 | This study        |
| P12 <i>cagL</i> <sup>DE</sup>   | P12 $\Delta$ <i>cagL</i> knocked-in with <i>cagL</i> from p26695 <i>cagL</i> <sup>DE</sup> :: <i>cat</i> ; Cm <sup>R</sup>                                                                 | This study        |
| P12 <i>cagL</i> <sup>DK</sup>   | P12 $\Delta$ <i>cagL</i> knocked-in with <i>cagL</i> from p26695 <i>cagL</i> <sup>DK</sup> :: <i>cat</i> ; Cm <sup>R</sup>                                                                 | This study        |
| P12 <i>cagL</i> <sup>YE</sup>   | P12 $\Delta$ <i>cagL</i> knocked-in with <i>cagL</i> from p26695 <i>cagL</i> <sup>YE</sup> :: <i>cat</i> ; Cm <sup>R</sup>                                                                 | This study        |
| 26695 $\Delta$ <i>cagL</i>      | Complete <i>cagL</i> (HP0539) deletion; Km <sup>R</sup>                                                                                                                                    | This study        |
| 26695 <i>cagL</i> <sup>NE</sup> | 26695 $\Delta$ <i>cagL</i> knocked-in with <i>cagL</i> from p26695 <i>cagL</i> <sup>WT</sup> :: <i>cat</i> (HP0539); Cm <sup>R</sup>                                                       | This study        |
| 26695 <i>cagL</i> <sup>NK</sup> | 26695 $\Delta$ <i>cagL</i> knocked-in with <i>cagL</i> from p26695 <i>cagL</i> <sup>NK</sup> :: <i>cat</i> ; Cm <sup>R</sup>                                                               | This study        |
| 26695 <i>cagL</i> <sup>DE</sup> | 26695 $\Delta$ <i>cagL</i> knocked-in with <i>cagL</i> from p26695 <i>cagL</i> <sup>DE</sup> :: <i>cat</i> ; Cm <sup>R</sup>                                                               | This study        |
| 26695 <i>cagL</i> <sup>DK</sup> | 26695 $\Delta$ <i>cagL</i> knocked-in with <i>cagL</i> from p26695 <i>cagL</i> <sup>DK</sup> :: <i>cat</i> ; Cm <sup>R</sup>                                                               | This study        |
| 26695 <i>cagL</i> <sup>YE</sup> | 26695 $\Delta$ <i>cagL</i> knocked-in with <i>cagL</i> from p26695 <i>cagL</i> <sup>YE</sup> :: <i>cat</i> ; Cm <sup>R</sup>                                                               | This study        |
