# Supplementary material for: Preservation of Helicobacter pylori CagA Translocation and Host Cell Proinflammatory Responses in the Face of CagL Hypervariability at Amino Acid Residues 58/59
Source: PubMed Central journal article supplement (PMC4509909; doi:10.1371/journal.pone.0133531), 2015-07-21
Supplement: pone.0133531.s008.pdf [file pone.0133531.s008.pdf]

**S2 Table. Plasmids and primers used in this study.**

| <b>Plasmid</b>                                 | <b>Genotype</b>                                                                                                       | <b>References</b> |
|------------------------------------------------|-----------------------------------------------------------------------------------------------------------------------|-------------------|
| p26695 <i>cagL</i> <sup>WT</sup> :: <i>cat</i> | pGEM-T easy containing <i>cagL</i> plus <i>cagI</i> and <i>cagN</i> flanking regions (26695 genome nts 570713-571881) | [12]              |
| p26695 <i>cagL</i> <sup>NK</sup> :: <i>cat</i> | E59 to K59 substitution of p26695 <i>cagL</i> <sup>WT</sup>                                                           | This study        |
| p26695 <i>cagL</i> <sup>DE</sup> :: <i>cat</i> | N58 to D58 substitution of p26695 <i>cagL</i> <sup>WT</sup>                                                           | This study        |
| p26695 <i>cagL</i> <sup>DK</sup> :: <i>cat</i> | N58 to K58 & E59 to K59 substitutions of p26695 <i>cagL</i> <sup>WT</sup>                                             | This study        |
| p26695 <i>cagL</i> <sup>YE</sup> :: <i>cat</i> | N58 to Y58 substitution of p26695 <i>cagL</i> <sup>WT</sup>                                                           | This study        |

  

| <b>Primer name</b> | <b>Sequence (5' → 3')</b> |
|--------------------|---------------------------|
| R-CagL58/59        | ATTAGCACTAGGGCTAGTGGTTG   |
| F-CagLN58/K59      | AATAAAATGGGTGAAGAAGATGCTC |
| F-CagLD58/E59      | GATGAAATGGGTGAAGAAGATGCTC |
| F-CagLY58/E59      | TATGAAATGGGTGAAGAAGATGCTC |
| F-CagLD58/K59      | GATAAAATGGGTGAAGAAGATGCTC |
